# Supplementary material for: Glycyrrhizic acid promotes neural repair by directly driving functional remyelination
Source: Royal Society of Chemistry journal article supplement (doi:10.1039/c9fo01459d), 2019-11-28
Supplement: c9fo01459d5.pdf [file c9fo01459d5.pdf]

1 **Supplementary figure legends**

2 **Fig. S1 Pre-treatment of GA failed to relieve demyelination in the cuprizone-induced**

3 **demyelinated model.** 6 week-old male C57BL/6 mice were fed with normal chow for 2

4 weeks, and then with cuprizone for 6 weeks, treated with GA (50 mg/kg) or PBS every

5 day (Mice with 8 weeks normal chow as control). Body weights (a) of mice were

6 recorded every week. (b) LFB and FluoroMyelin stains of the corpus callosum. (c, d)

7 Quantitative analysis of myelinated and fluoromyelinated areas measured at random areas

8 in the white matter of spinal cords using Image Pro. Data are mean  $\pm$  SD (n = 5 each

9 group). Scale bar = 100  $\mu$ m in (b).

10

11 **Fig. S2 GSK-3 $\beta$  expression during OPC maturation under GA and/or AR-A014418**

12 **treatment** (a) Primary OPCs isolated from brain of newborn C57BL/6 mice (postnatal

13 day 3) were treated with/without GA (10  $\mu$ M) or AR-A014418 (20 $\mu$ M) in OPC

14 differentiation medium for 48 h, then probed for western blot of total GSK-3 $\beta$ , phospho-

15 GSK-3 $\beta$ , and  $\beta$ -actin. (b, c) Densitometry was determined by Image J and data were

16 analyzed by Graphpad Prism 6. Data are mean  $\pm$  SD (n = 3 each group) and by

17 nonparametric test. \*p < 0.05. \*\*p < 0.01, \*\*\*p < 0.001.

18

19 **Fig. S3** Schematic diagram of the measured area of spinal cord white matter.

20
